# Supplementary material for: Heme-oxygenase-1 implications in cell morphology and the adhesive behavior of prostate cancer cells
Source: PubMed Central journal article supplement (PMC4147308; doi:10.18632/oncotarget.1826), 2014-03-16
Supplement: oncotarget-05-4087-s002.pdf [file oncotarget-05-4087-s002.pdf]

## Heme-oxygenase-1 implications in cell morphology and the adhesive behavior of prostate cancer cells – Gueron et al

**Supplemental Table S1: Gene ontology analysis of down-regulated genes in hemin treated PC3 cells versus their respective control cell line.**

| Category  | Term                                         | p value | - log (p) | Genes                                    |
|-----------|----------------------------------------------|---------|-----------|------------------------------------------|
| BP        | G-protein coupled receptor protein signaling | 3.5E-02 | 1.46      | CXCL1, CXCL5, CXCL3                      |
| BP        | Immune response                              | 8.2E-02 | 1.08      | CXCL1, CXCL5, CXCL3, VEGFA               |
| MF        | Cytokine activity                            | 4.2E-02 | 1.37      | CXCL1, CXCL5, CXCL3, VEGFA               |
| MF        | Chemokine activity                           | 7.4E-02 | 1.13      | CXCL1, CXCL5, CXCL3                      |
| MF        | Chemokine receptor binding                   | 7.4E-02 | 1.13      | CXCL1, CXCL5, CXCL3                      |
| CC        | Extracellular space                          | 3.3E-02 | 1.48      | CXCL1, CXCL5, CXCL3, MMP9, VEGFA, ANGPT2 |
| KEGG path | Cytokine-cytokine receptor interaction       | 8.0E-04 | 3.09      | CXCL1, CXCL5, CXCL3, VEGFA               |
| KEGG path | Chemokine signaling                          | 2.8E-03 | 2.56      | CXCL1, CXCL5, CXCL3                      |

**Supplemental Table S2: Gene ontology analysis of down-regulated genes in PC3HO-1 cells versus their respective control cell line.**

| Category  | Term                                              | p value | - log (p) | Genes                                                                            |
|-----------|---------------------------------------------------|---------|-----------|----------------------------------------------------------------------------------|
| BP        | G-protein coupled receptor protein signaling      | 3.1E-03 | 2.51      | CXCL1, IL8, CXCL5, CXCL3, CXCL10                                                 |
| BP        | Locomotion regulation                             | 3.4E-03 | 2.47      | IL6, IL8, MMP9, VEGFA, ANGPTL3, THBS1, CXCL10                                    |
| BP        | Immune response                                   | 3.9E-03 | 2.41      | CXCL1, IL6, IL8, CXCL5, CXCL3, VEGFA, THBS1, CXCL10                              |
| BP        | Cell surface receptor linked signaling            | 8.1E-03 | 2.09      | CXCL1, IL8, CXCL5, CXCL3, VEGFA, ANGPT1, ANGPTL3, FIGF, CXCL10                   |
| BP        | Cell migration regulation                         | 1.2E-02 | 1.91      | IL6, MMP9, VEGFA, ANGPTL3, THBS1, CXCL10                                         |
| BP        | Locomotory behavior                               | 1.5E-02 | 1.82      | CXCL1, IL6, IL8, CXCL5, CXCL3, CXCL10                                            |
| BP        | Chemotaxis regulation                             | 2.3E-02 | 1.63      | IL6, IL8, VEGFA, THBS1                                                           |
| BP        | Posttranscriptional regulation of gene expression | 3.1E-02 | 1.50      | IL6, VEGFA, THBS1                                                                |
| BP        | Cell proliferation regulation                     | 3.5E-02 | 1.45      | CXCL1, IL6, IL8, CXCL5, VEGFA, THBS1, FIGF, CXCL10                               |
| MF        | Cytokine activity                                 | 1.3E-02 | 1.87      | CXCL1, IL6, IL8, CXCL5, CXCL3, VEGFA, CXCL10                                     |
| MF        | Chemokine activity                                | 2.3E-02 | 1.64      | CXCL1, IL8, CXCL5, CXCL3, CXCL10                                                 |
| MF        | Chemokine receptor binding                        | 2.3E-02 | 1.64      | CXCL1, IL8, CXCL5, CXCL3, CXCL10                                                 |
| CC        | Extracellular space                               | 5.0E-04 | 3.31      | CXCL1, IL6, IL8, CXCL5, CXCL3, MMP9, VEGFA, ANGPT1, ANGPTL3, THBS1, FIGF, CXCL10 |
| CC        | Platelet alpha granule lumen                      | 6.9E-02 | 1.16      | VEGFA, THBS1, FIGF                                                               |
| KEGG path | Cytokine-cytokine receptor interaction            | 3.3E-08 | 7.48      | CXCL1, IL6, IL8, CXCL5, CXCL3, VEGFA, FIGF, CXCL10                               |
| KEGG path | Chemokine signaling                               | 1.1E-05 | 4.95      | CXCL1, IL8, CXCL5, CXCL3, CXCL10                                                 |
| KEGG path | Bladder cancer                                    | 5.0E-05 | 4.30      | IL8, MMP9, VEGFA, THBS1, FIGF                                                    |
| KEGG path | Pathways in cancer                                | 2.3E-04 | 3.65      | IL6, IL8, MMP9, VEGFA, FIGF                                                      |
| KEGG path | NOD-like receptor signaling                       | 6.5E-03 | 2.18      | CXCL1, IL6, IL8                                                                  |
| KEGG path | Toll-like receptor signaling pathway              | 1.1E-02 | 1.97      | IL6, IL8, CXCL10                                                                 |
| KEGG path | Focal adhesion                                    | 3.5E-02 | 1.44      | VEGFA, THBS1, FIGF                                                               |
